# Supplementary material for: Ionization of hole-transporting materials as a method for improving the photovoltaic performance of perovskite solar cells
Source: Royal Society of Chemistry journal article supplement (doi:10.1039/d3ta06427a), 2023-12-18

## Supporting Information

### Ionization of Hole-Transporting Materials as a Method for Improving the Photovoltaic Performance of Perovskite Solar Cells

*Yogesh S. Tingare,<sup>\*a</sup> Chien-Hsiang Lin,<sup>b</sup> Chaochin Su,<sup>\*a</sup> Sheng-Chin Chou,<sup>a</sup> Ya-Chun Hsu,<sup>a</sup> Dibyajyoti Ghosh,<sup>\*c</sup> Ning-Wei Lai,<sup>a</sup> Xin-Rui Lew,<sup>b</sup> Sergei Tretiak,<sup>d,e</sup> Hsinhan Tsai,<sup>\*f</sup> Wanyi Nie,<sup>\*e,g</sup> and Wen-Ren Li<sup>\*b</sup>*

<sup>a</sup>Prof. Y. S. Tingare, Prof. C. Su, S.-C. Chou, Y.-C. Hsu, N.-W. Lai

Institute of Organic and Polymeric Materials/Research and Development Center for Smart Textile Technology, National Taipei University of Technology, Taipei-106344, Taiwan

E-mail: [f12098@ntut.edu.tw](mailto:f12098@ntut.edu.tw); [f10913@mail.ntut.edu.tw](mailto:f10913@mail.ntut.edu.tw)

<sup>b</sup>C.-H. Lin, X.-R. Lew, Prof. W.-R. Li

Department of Chemistry, National Central University, Zhongli-32001, Taiwan

E-mail: [ch01@ncu.edu.tw](mailto:ch01@ncu.edu.tw)

<sup>c</sup>Prof. D. Ghosh

Department of Chemistry and Department of Materials Science and Engineering (DMSE), Indian Institute of Technology, Delhi, Hauz Khas, New Delhi-110016, India

E-mail: [dibyajyoti@iitd.ac.in](mailto:dibyajyoti@iitd.ac.in)

Dr. S. Tretiak

<sup>d</sup>Theoretical Division, Los Alamos National Laboratory, Los Alamos National Laboratory, Los Alamos, NM-87545, USA.

<sup>e</sup>Center for Integrated Nanotechnologies, Materials Physics and Application Division, Los Alamos National Laboratory, Los Alamos, NM-87545, USA.

Dr. H. Tsai

<sup>f</sup>Department of Chemistry, University of California, Berkeley, Berkeley, CA 94720

E-mail: [hsinhantsai@berkeley.edu](mailto:hsinhantsai@berkeley.edu)

Dr. W. Nie

<sup>e</sup>Center for Integrated Nanotechnologies, Materials Physics and Application Division, Los Alamos National Laboratory, Los Alamos, NM-87545, USA.

<sup>g</sup>Department of Physics, University at Buffalo, The State University of New York, Buffalo, NY 14260, USA. E-mail: [wanyinie@buffalo.edu](mailto:wanyinie@buffalo.edu)

## Supplementary Figures

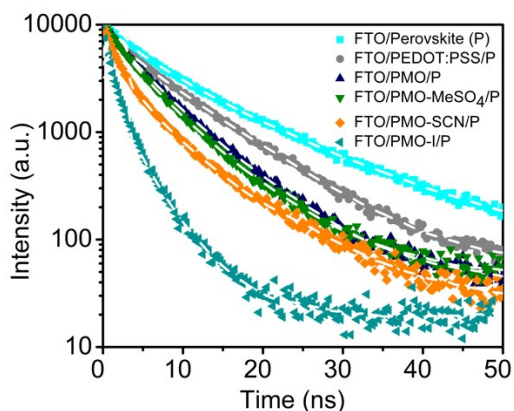

**Figure S1.** Time-resolved photoluminescence for perovskites and perovskites/HTM interface.

**Table S1.** The detailed parameters of PL obtained by fitting the TRPL of **PEDOT:PSS**, **PMO**, **PMO-MeSO<sub>4</sub>**, **PMO-SCN** and **PMO-I**.

| HTM                         | $A_1$   | $\tau_1$ | $A_2$  | $\tau_2$ | $\tau_{Avg}$ |
|-----------------------------|---------|----------|--------|----------|--------------|
| <b>FTO</b>                  | 6827.6  | 6.0261   | 3025.2 | 17.46    | 9.539        |
| <b>PEDOT:PSS</b>            | 1976.6  | 1.7197   | 7534.3 | 8.3250   | 6.952        |
| <b>PMO</b>                  | 4996.3  | 3.3416   | 5037.3 | 7.3400   | 5.349        |
| <b>PMO-MeSO<sub>4</sub></b> | 5765.80 | 3.2037   | 4246.2 | 7.4159   | 4.990        |
| <b>PMO-SCN</b>              | 6472.00 | 1.5049   | 3648.3 | 6.7962   | 3.412        |
| <b>PMO-I</b>                | 5765.49 | 0.6980   | 3985.9 | 2.6811   | 1.509        |

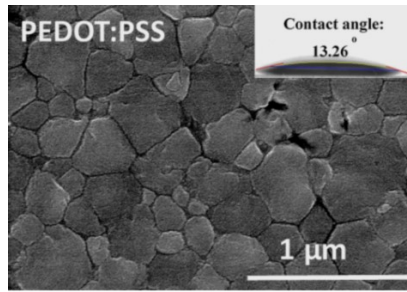

**Figure S2.** Scanning electron microscopy top-view image, with inset water contact angle, of PEDOT:PSS film.

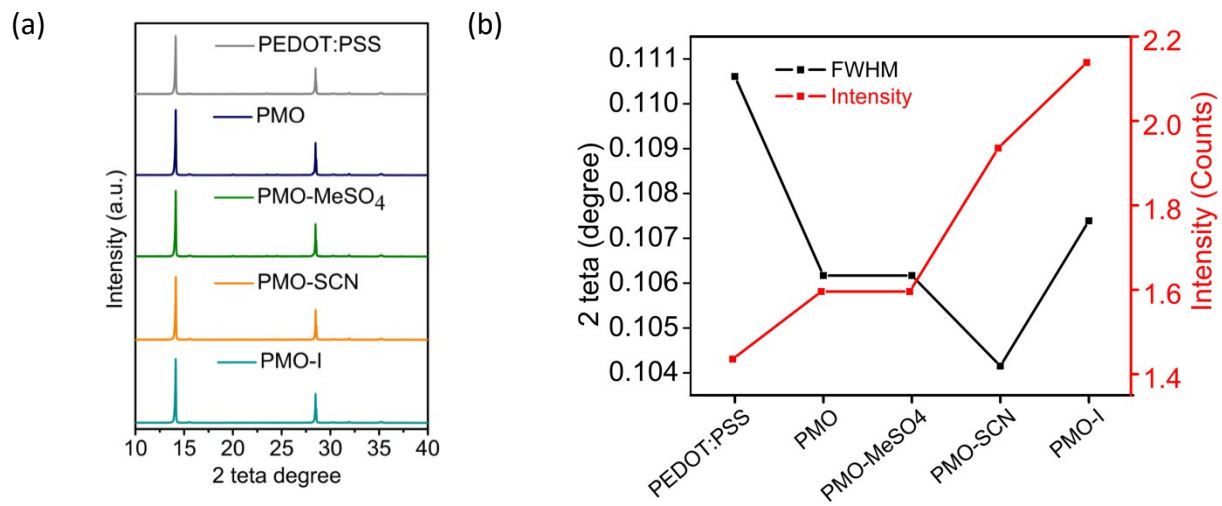

**Figure S3.** (a) X-ray diffraction of perovskite films atop of different HTM films. (b) Fitted results of X-ray diffraction ratio.

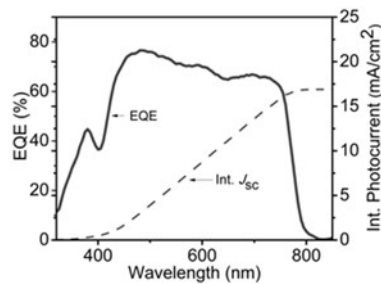

**Figure S4.** EQE spectra with integrated  $J_{sc}$  of the PSCs with PEDOT:PSS.

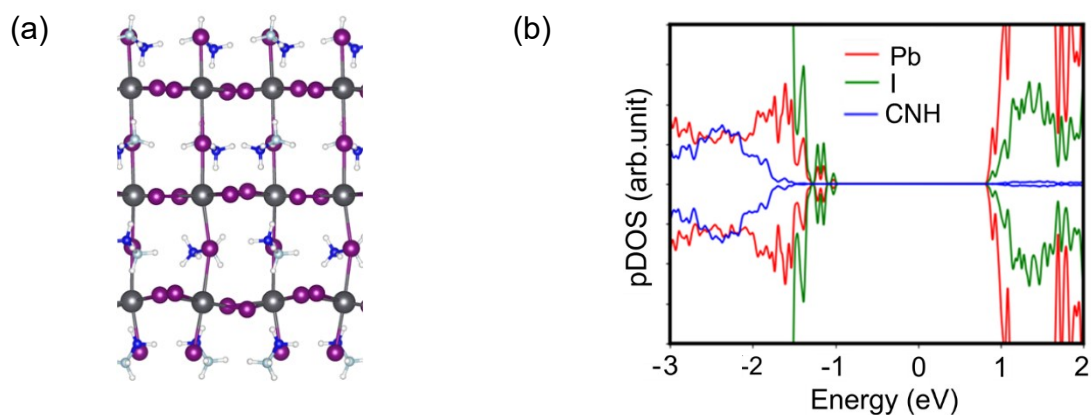

**Figure S5.** The (a) optimized structure and (b) partial density of states (pDOS) of pristine MAPbI<sub>3</sub> slab. The slab has four layers of PbI<sub>2</sub>. The pDOS depicts that there is no surface induced state(s) appear inside the bandgap of MAPbI<sub>3</sub>.

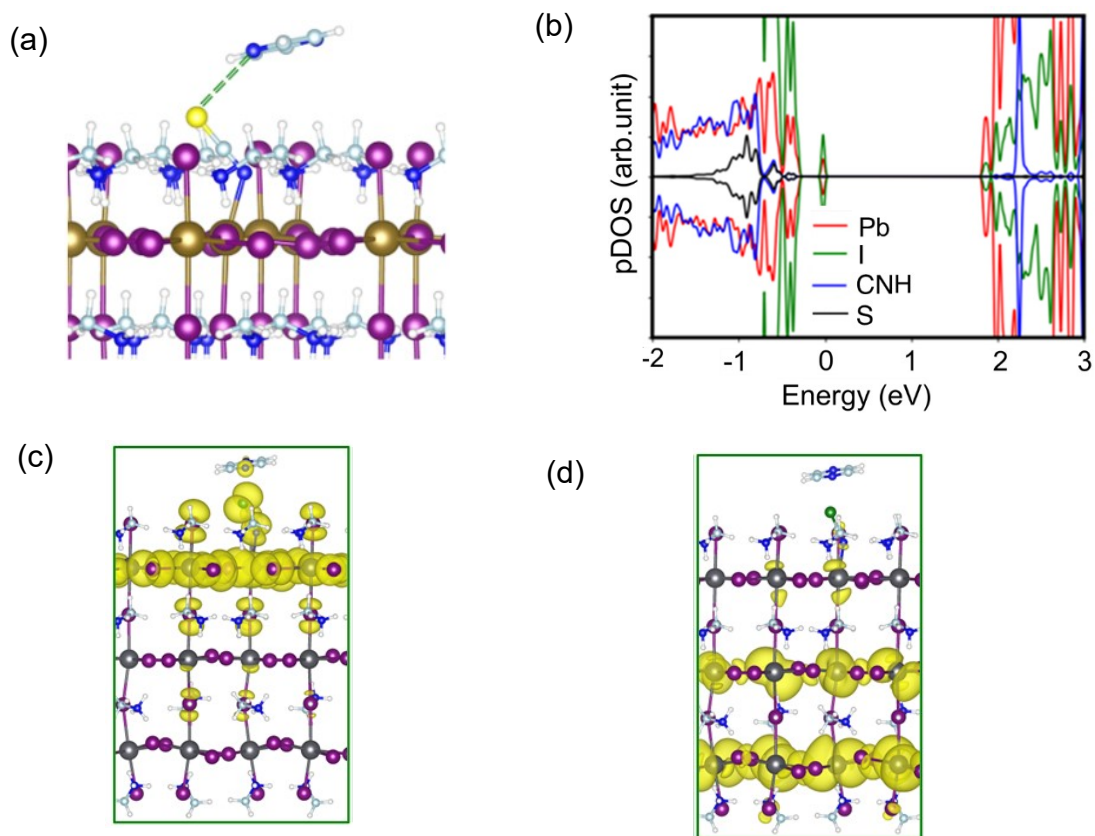

**Figure S6.** The (a) optimized structure and (b) partial density of states (pDOS) of **PMO-SCN** passivated MAPbI<sub>3</sub> slab. The charge densities of the (c) VBM and (d) CBM. The wavefunctions of the band edge states show significant delocalization. Key: Sulphur (green).

# H<sup>1</sup> and C<sup>13</sup> NMR

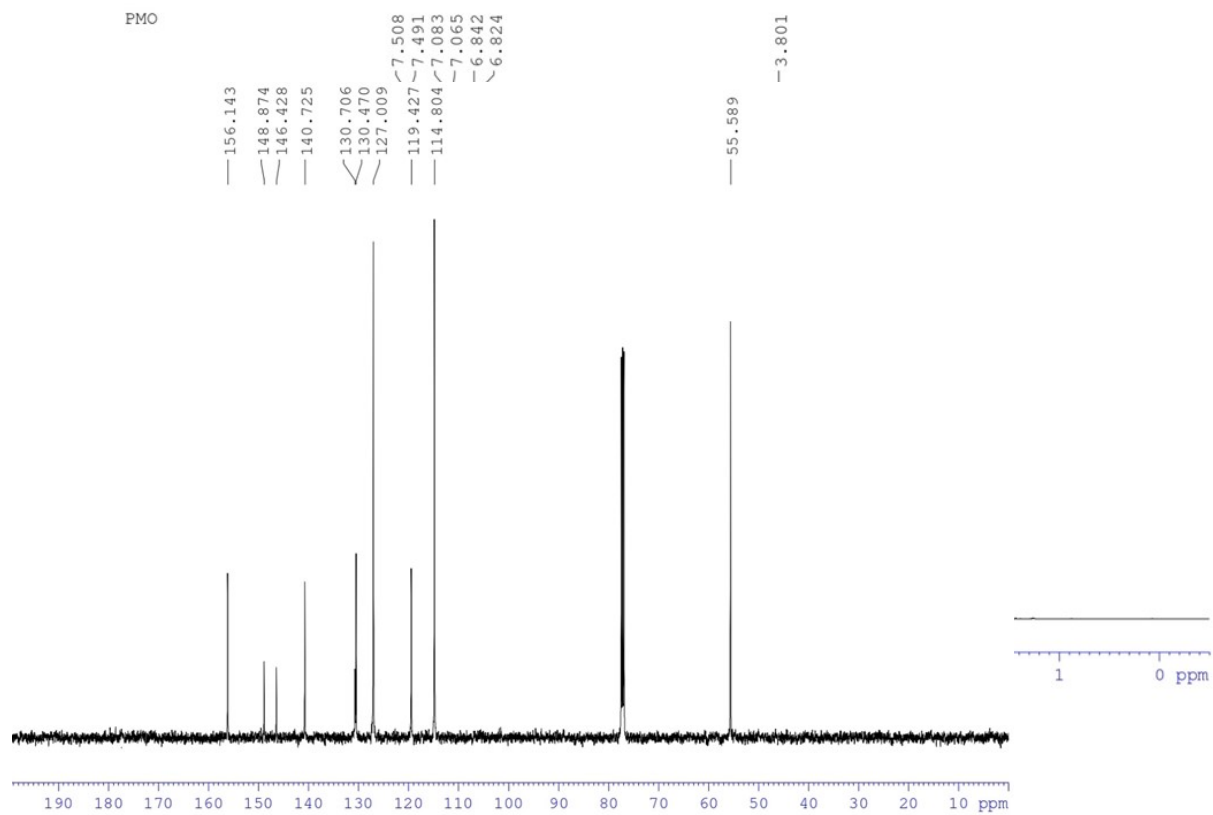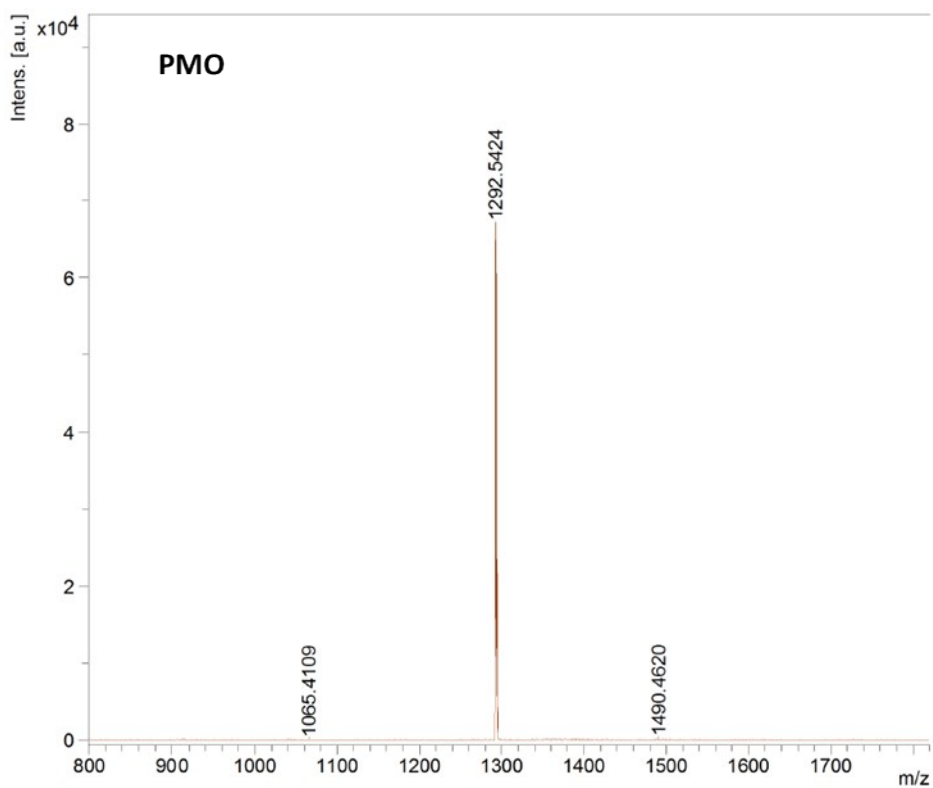

PMO-MeSO<sub>4</sub>

7.449  
7.431  
7.237  
7.219  
7.094  
7.075  
7.057  
6.924  
6.907  
6.874  
6.860  
6.857  
6.843  
6.756  
6.738

4.079  
3.809  
3.801  
3.482

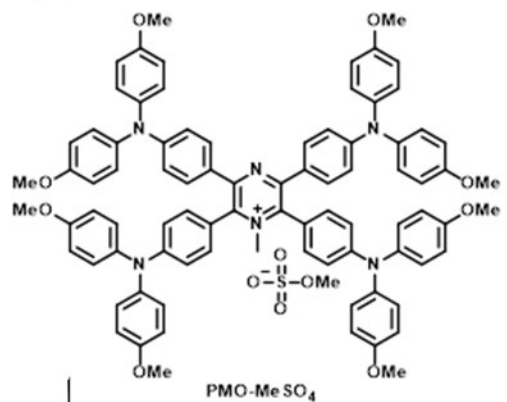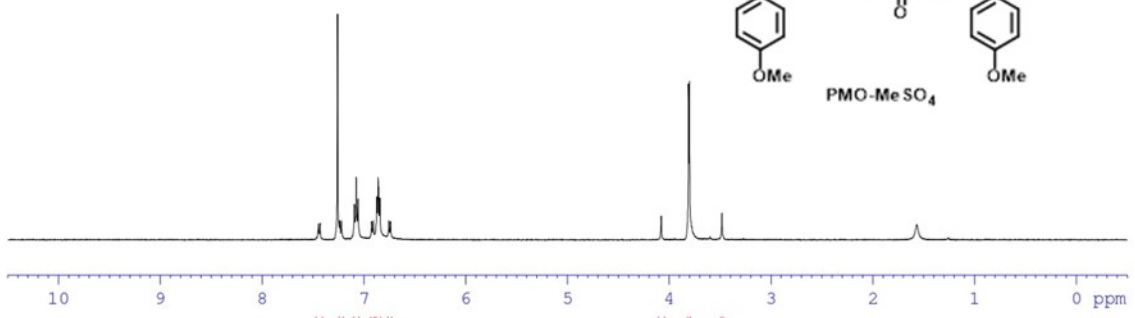

4.000  
4.107  
16.037  
4.027  
16.422  
4.384

2.821  
24.000  
3.027

PMO-MeSO<sub>4</sub>

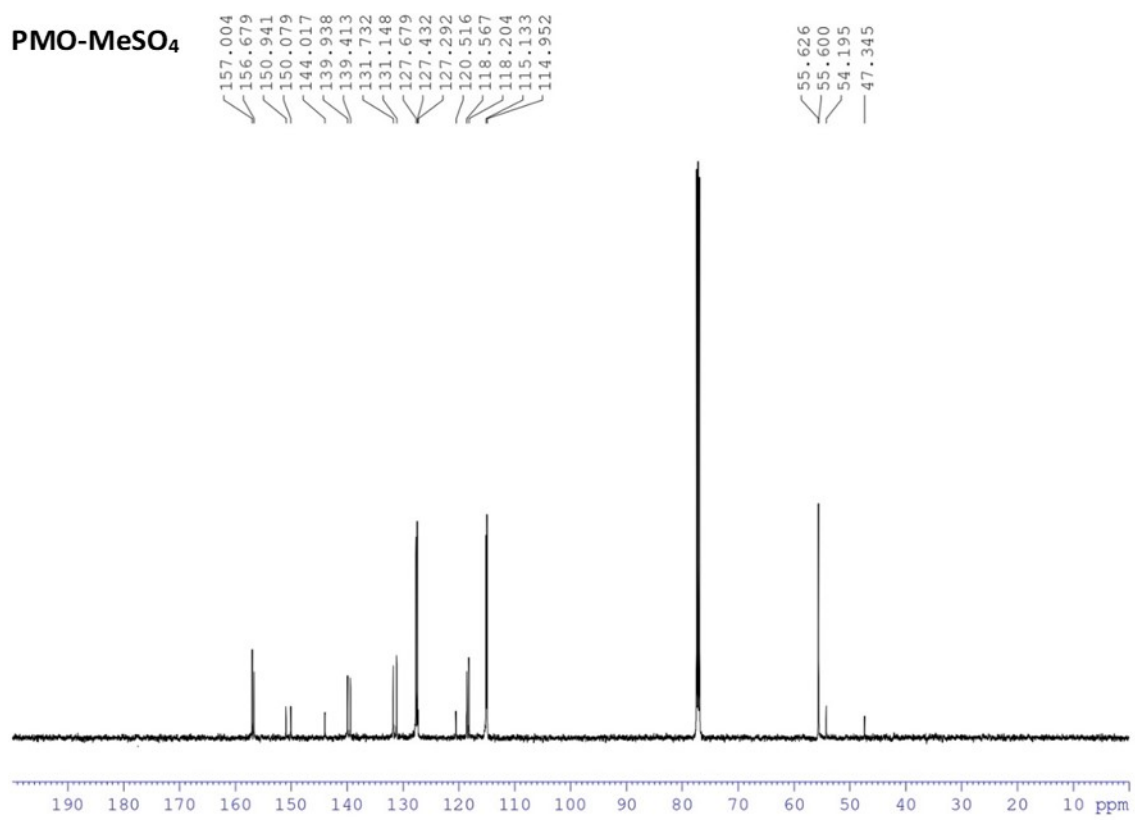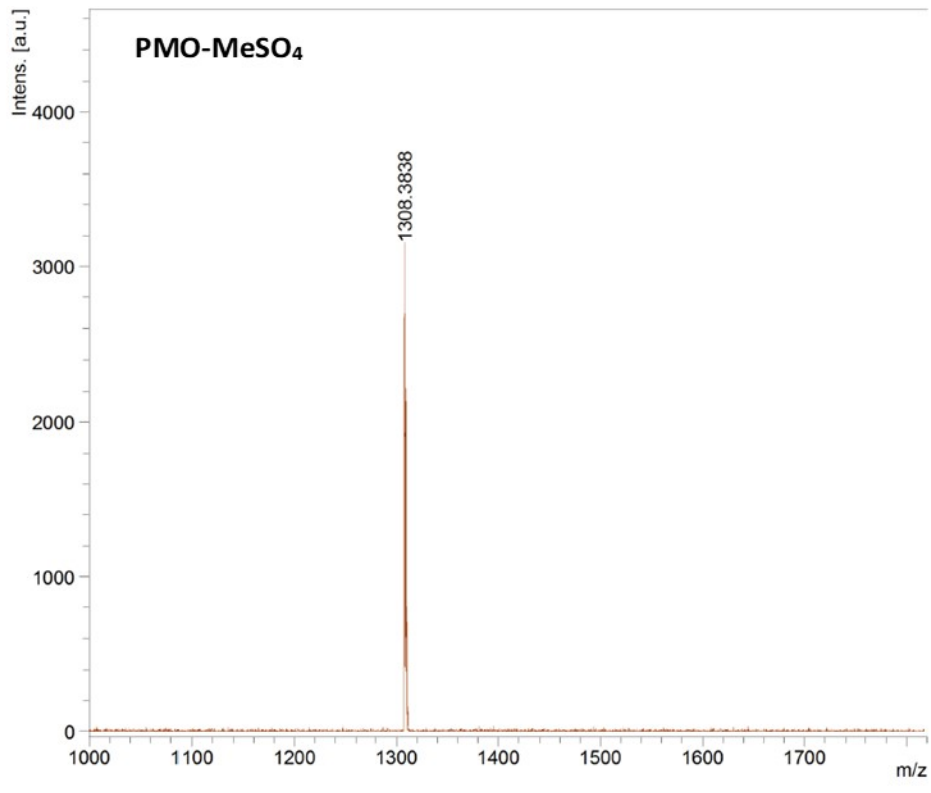





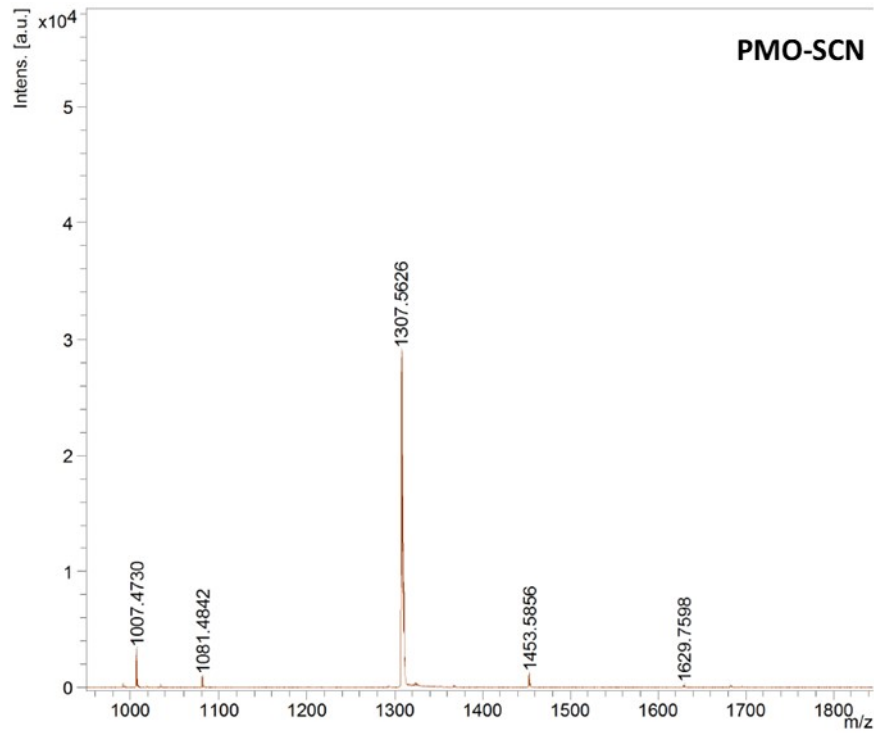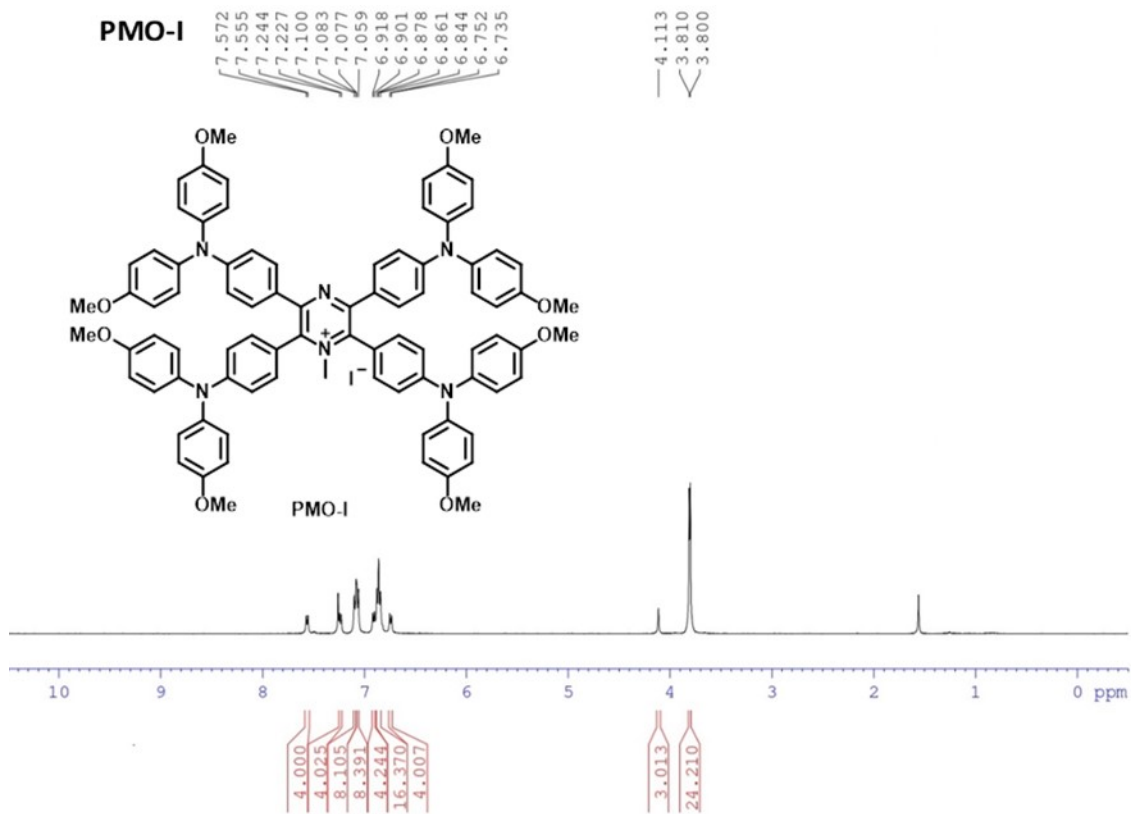

PMO-I

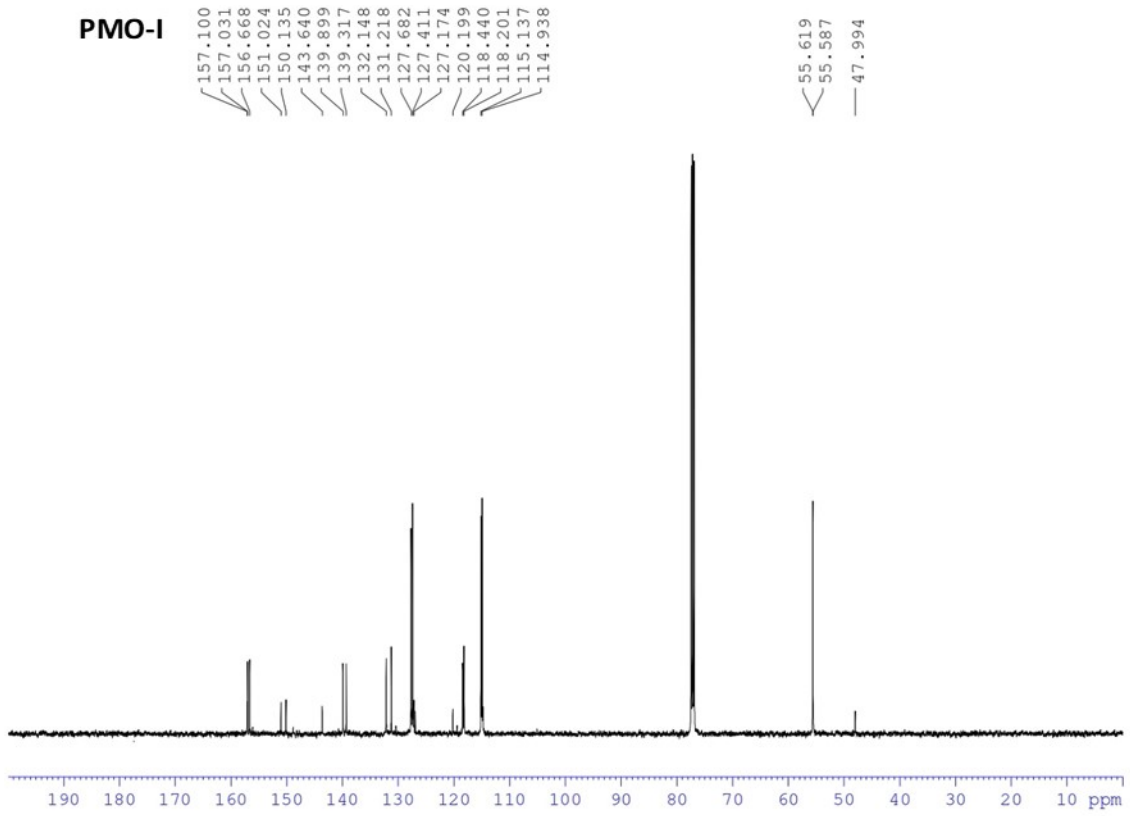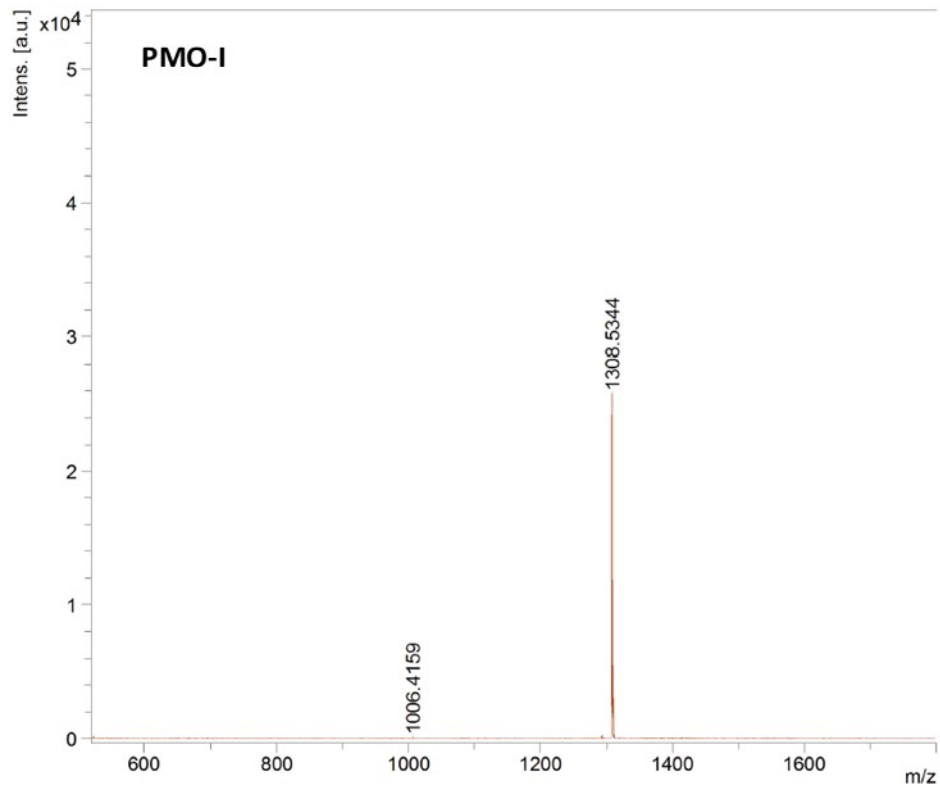

Supplement: d3ta06427a1.pdf [file d3ta06427a1.pdf]
